# Supplementary material for: Ionospheric response modeling under eclipse conditions: Evaluation of 14 December 2020, total solar eclipse prediction over the South American sector
Source: Frontiers journal article supplement (doi:10.3389/fspas.2022.1021910), 2022-12-14
Supplement: Data_Sheet_1.pdf [file Data_Sheet_1.pdf]

## Supplementary Material

### 1 Supplementary Figures

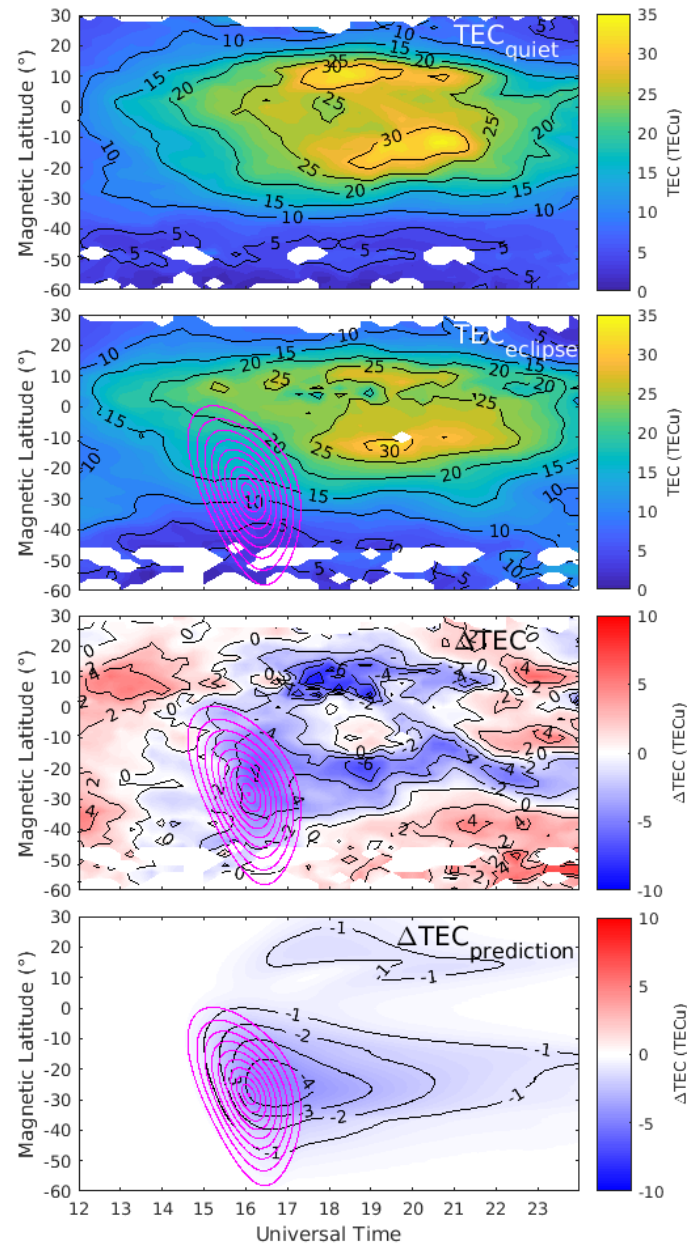

**Supplementary Figure 1.** Total electron content response time evolution obtained with the Seemala technique for reference day (top), the December 14, 2020, solar eclipse (middle), and eclipse-modified differences of TEC ( $\Delta\text{TEC}$ , third row) along the magnetic meridian of Chillán ( $36.6^\circ\text{S}$ ,  $72.0^\circ\text{W}$ ) and the SUPIM-INPE predicted differences ( $\Delta N_{\text{prediction}}$ , bottom). Evolution of the eclipse obscuration mask at 300 km height each 10% obscuration (magenta lines).

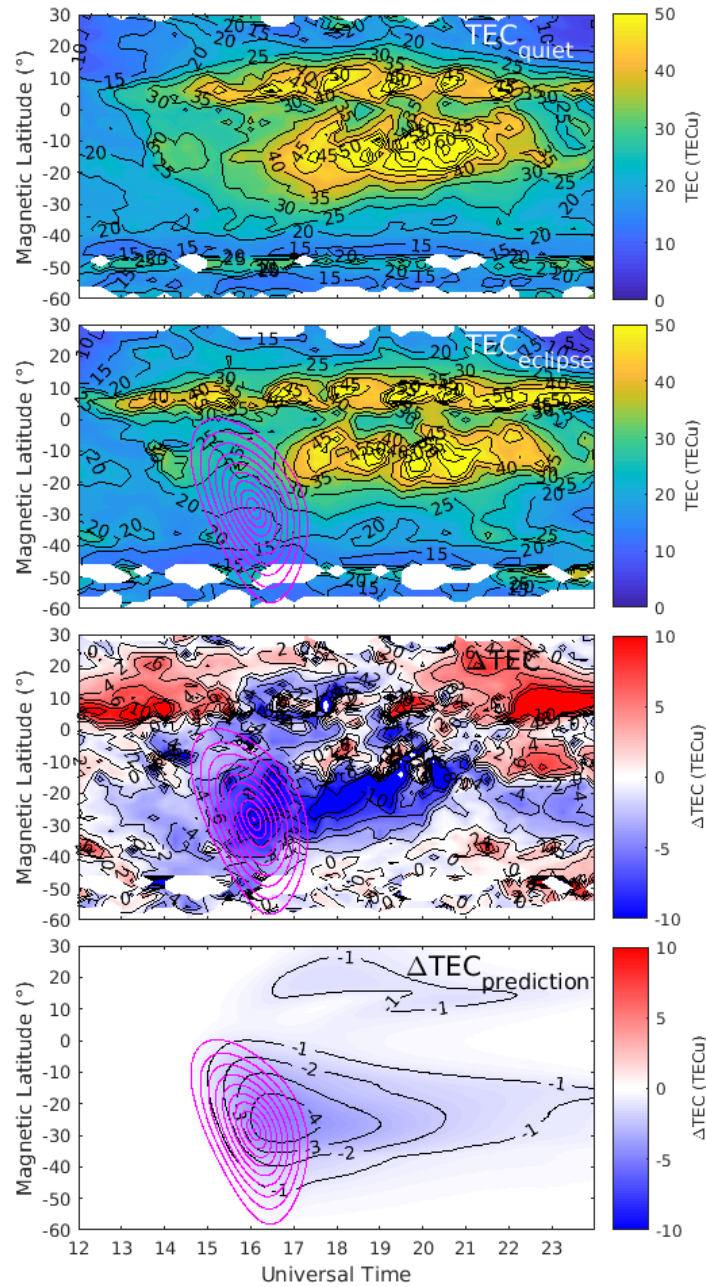

**Supplementary Figure 2.** Total electron content response time evolution obtained with the Ciraolo technique for reference day (top), the December 14, 2020, solar eclipse (middle), and eclipse-modified differences of TEC ( $\Delta\text{TEC}$ , third row) along the magnetic meridian of Chillán ( $36.6^\circ\text{S}$ ,  $72.0^\circ\text{W}$ ) and the SUPIM-INPE predicted differences ( $\Delta N_{\text{prediction}}$ , bottom). Evolution of the eclipse obscuration mask at 300 km height each 10% obscuration (magenta lines).
